# Supplementary material for: Gas-induced modulation of carbon nitride morphology through a green one-step calcination strategy
Source: Royal Society of Chemistry journal article supplement (doi:10.1039/d4gc05794e), 2025-01-01
Supplement: d4gc05794e1.pdf [file d4gc05794e1.pdf]

**Supplementary Information for**

**Gas-induced modulation of carbon nitride morphology in a  
green one-step calcination strategy**

**Jie Wu<sup>1</sup>, Zheng Liu<sup>1</sup>, Mengjie Li, Jinjuan Zhao, Shuwen Li\* and Honglei Yang\***

State Key Laboratory of Applied Organic Chemistry, Gansu Provincial Engineering  
Laboratory for Chemical Catalysis, College of Chemistry and Chemical Engineering,  
Lanzhou University, Lanzhou, 730000, P. R. China

<sup>1</sup>These authors contributed equally to this work.

\*Corresponding author.

E-mail addresses: lishw@lzu.edu.cn (Shuwen Li), yanghl@lzu.edu.cn (Honglei Yang)

## **Text S1. Sample characterization instruments**

SEM images were obtained with a Hitachi S-4800 instrument. Transmission electron microscopy (TEM), high-resolution transmission electron microscopy (HRTEM) and EDS mappings were performed on the FEI talos F200s electron microscope. Powder X-ray diffraction (XRD) patterns were carried out on a Rigaku D/max-2400 diffractometer with Cu-K $\alpha$  radiation. The nitrogen adsorption-desorption isotherms and pore size distribution curves were recorded with an ASAP 2460 analyzer after degassing in a vacuum at 200 °C for 12 h and the SSA was calculated using the Brunauer-Emmett-Teller (BET) method. X-ray photoelectron spectroscopy (XPS) was conducted on an Axis Supra X-ray photoelectron spectrometer with a monochromatic Al K $\alpha$  X-ray source. Elemental analysis was conducted with a Vario EL cube element analyzer. The content of C and N elements was measured by means of a vario EL cube elemental analyser from Elementar, Germany. Photoluminescence (PL) spectra were acquired using an FLS 920 fluorescence spectrofluorometer. Solid-state UV-vis diffuse reflectance spectra (UV-vis DRS) were operated on a UV-2600 spectrophotometer using BaSO<sub>4</sub> as a background. Electron paramagnetic resonance (EPR) spectra were recorded on an ER200DSRC10/12 spectrometer using DMPO as the capture agent.

## **Text S2. Photoelectrochemical (PEC) measurements**

The transient photocurrent response curves, electrochemical impedance spectroscopy (EIS) and Mott-Schottky (M-S) plots were acquired with a CHI 760E

electrochemical workstation (Chenhua Instrument Co., Ltd, China) with a three-electrode configuration (an FTO spin-coated with catalyst, an Ag/AgCl electrode and a Pt slice were employed as the working electrode, reference electrode and counter electrode, respectively). The light source was a 300 W xenon lamp (PLS-SXE300+) with an ultraviolet filter ( $\lambda > 420$  nm) at an intensity of  $1000 \text{ mW cm}^{-2}$ , which was measured with an FZ-A radiometer. The electrolyte was  $0.2 \text{ M Na}_2\text{SO}_4$  aqueous solution.

FTO spin-coated with catalyst was prepared as follows: 20 mg of photocatalyst was dispersed in 4 mL of solution (1.8 mL of deionized water, 1.8 mL of ethanol and 0.4 mL of Nafion solution). After homogenization by ultrasound, 100  $\mu\text{L}$  of catalyst dispersion was spun on FTO conductive glass. This was repeated five times and the glass was dried at room temperature for photochemical testing. Spin coating parameters: rotation speed 3000 rpm, spin coating time 20 s.

### **Text S3. Activity of photocatalytic Cr(VI) reduction**

The reaction of photo-reduced Cr (VI) following pseudo-first-order kinetic model Eq. (S1)

$$\ln(C_0/C_t) = kt \quad (\text{S1})$$

Where  $C_0$  and  $C_t$  represent the concentration at time of 0 and t min,  $k$  is the kinetic constant of Cr (VI) reaction, t represents the irradiation time.

The internal quantum efficiency (IQE) is calculated as in Eq. (S2)<sup>1</sup>.

$$\text{IQE}(\lambda) = \frac{|j_{\text{ph}}| \times 1239.8}{P_{\text{mono}} \times \lambda \times (1 - 10^{-A})} \quad (\text{S2})$$

Where  $\lambda$  is the wavelength of monochromatic light (nm),  $j_{ph}$  is the optical current density measured by the chronocurrent method ( $\text{mA cm}^{-2}$ ),  $P_{\text{mono}}$  is the optical power density of monochromatic light calculated from Eq. S3 ( $\text{mW cm}^{-2}$ ), and  $A$  is the UV-vis DRS absorbance of the catalyst sample.

$$P_{\text{mono}} = 0.1 P/S \quad (\text{S3})$$

Where  $P$  is the optical power of monochromatic light (W),  $S$  is the detector light area of  $3.14 \times 10^{-4} \text{ m}^2$ .

#### **Text S4. Tauc plot to calculate the band gap $E_g$**

$$(Ah\nu)^{1/n} = B(h\nu - E_g) \quad (\text{S4})$$

Where  $A$  is the absorbance,  $h$  is Planck's constant,  $\nu$  is the frequency,  $B$  is a constant,  $E_g$  is the semiconductor forbidden bandwidth, the index  $n$  is directly related to the type of semiconductor, the direct bandgap  $n = 1/2$ , the indirect bandgap  $n = 2$ . Because the carbon nitride is an indirect bandgap semiconductor, therefore,  $n$  is taken to be 2. It can be seen from this formula,  $(Ah\nu)^{1/n}$  is linearly related to  $h\nu$ , and therefore, respectively, with  $(Ah\nu)^{1/2}$  as the y-axis.  $h\nu$  is plotted as the x-axis, and then the tangent line of the curve is extended in reverse to intersect with the x-axis,  $h\nu$  for the x-axis graph, and then extend the curve tangent to the x-axis intersection, the intersection point  $h\nu$  that is the semiconductor material for the optical indirect band gap  $E_g$ .

$$E_{\text{NEH}} = E_{\text{Ag/AgCl}} + 0.1976 \text{ V} \quad (\text{S5})$$

$E_{\text{NHE}}$  is the potential with the standard hydrogen electrode (NHE) as reference;

$E_{\text{Ag/AgCl}}$  is the potential with the Ag/AgCl electrode as reference.

$$E_{\text{VB}} = E_{\text{CB}} + E_{\text{g}} \quad (\text{S6})$$

$E_{\text{VB}}$  is the valence band potential;  $E_{\text{CB}}$  is the conduction band potential;  $E_{\text{g}}$  is the band gap.

## Results and Discussion

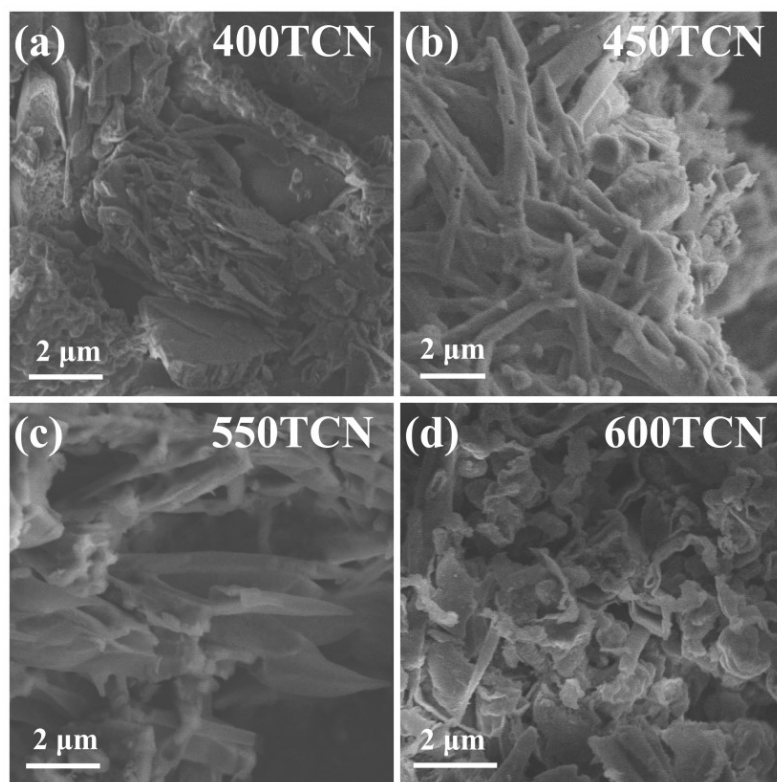

**Figure S1.** SEM of 400TCN (a), 450TCN (b), 550TCN (c), 600TCN (d).

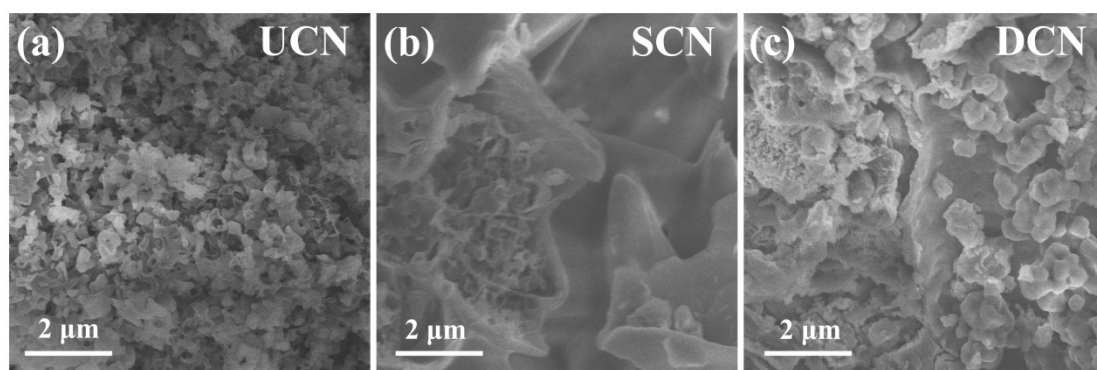

**Figure S2.** SEM of UCN (a), SCN (b), DCN (c).

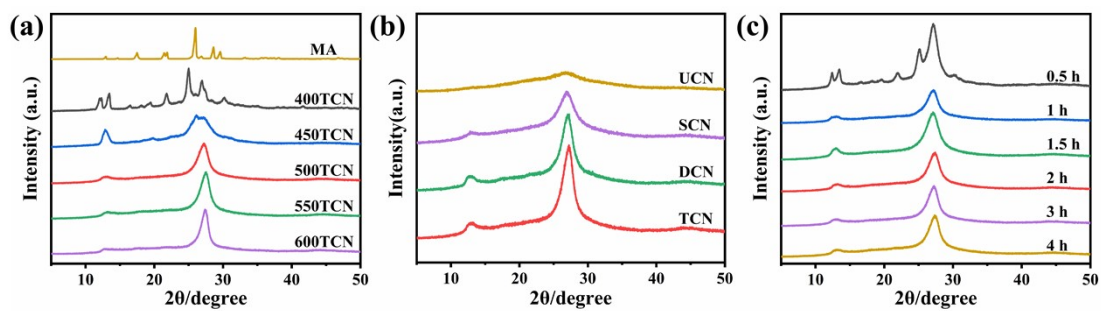

**Figure S3.** XRD of samples with different calcination temperatures (a), precursors (b), and holding times (c).

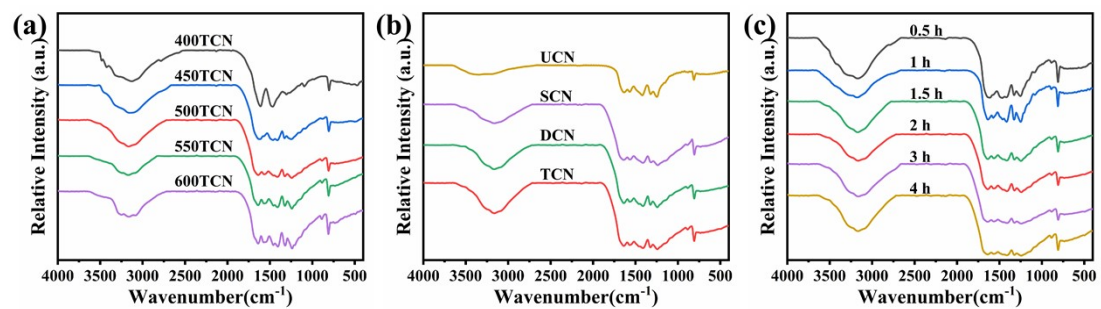

**Figure S4.** FTIR of samples with different calcination temperatures (a), precursors (b), and holding times (c).

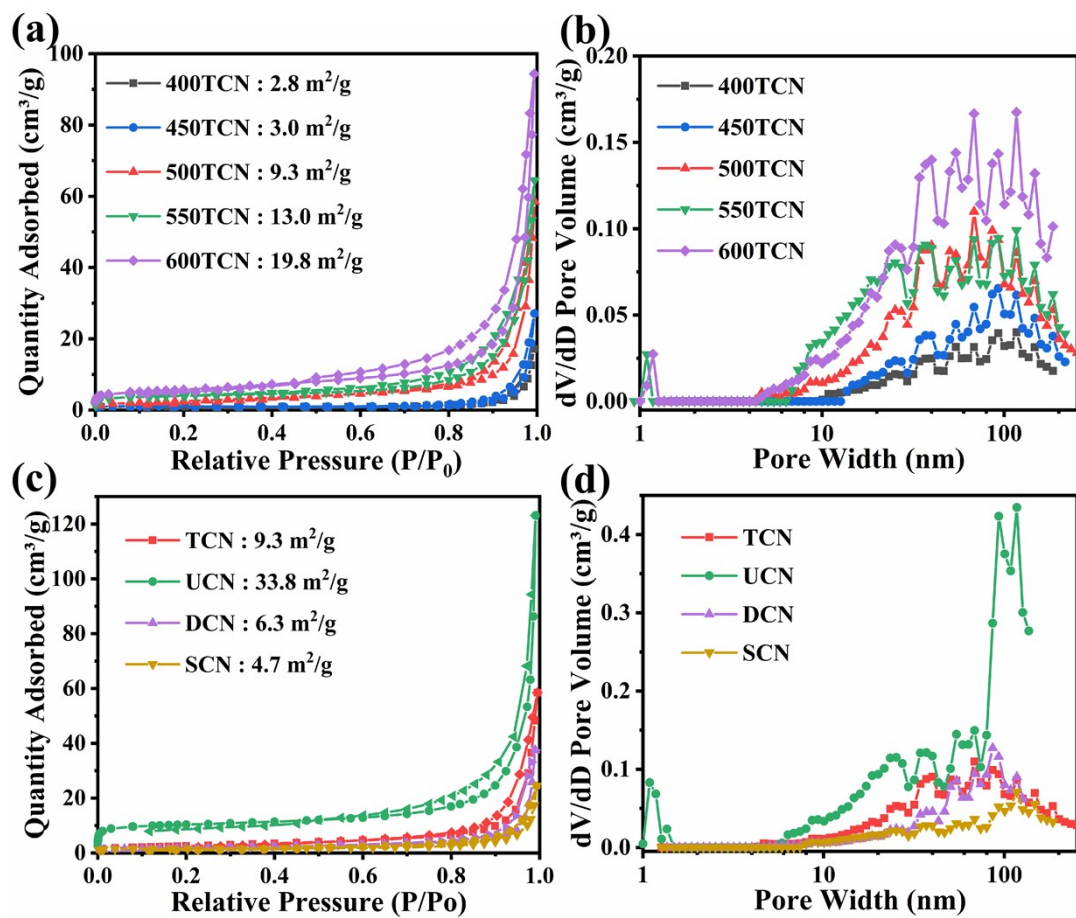

**Figure S5.** N<sub>2</sub> adsorption-desorption isotherms (a) and pore size distribution (b) for samples with different calcination temperatures; N<sub>2</sub> adsorption-desorption isotherms (c) and pore size distribution (d) for samples with different precursors.



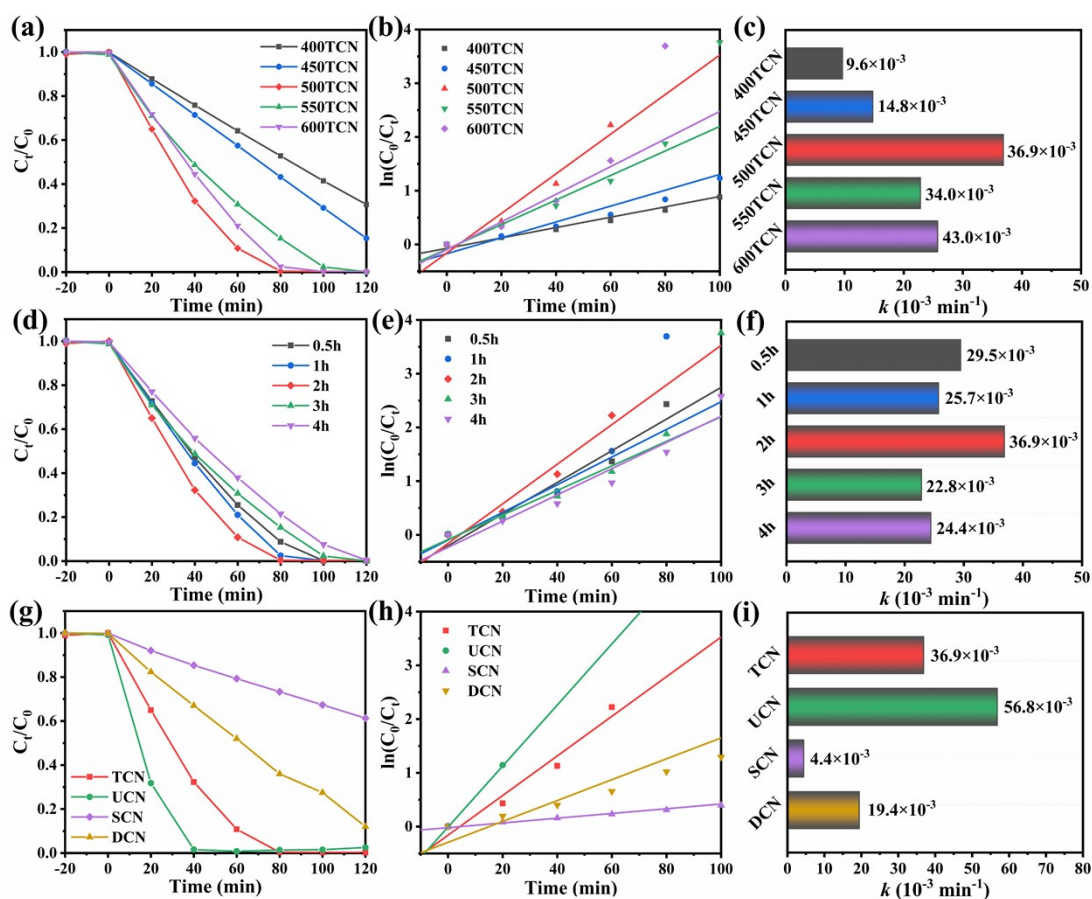

**Figure S6.** Photocatalytic activity of samples with different calcination temperatures

(a), first-order reaction (b), reaction rate constant  $k$  (c); photocatalytic activity of samples with different holding times (d), first-order reaction (e), reaction rate constant  $k$  (f); photocatalytic activity of samples with different precursor calcination (g), first-order reaction (h), reaction rate constant  $k$  (i).

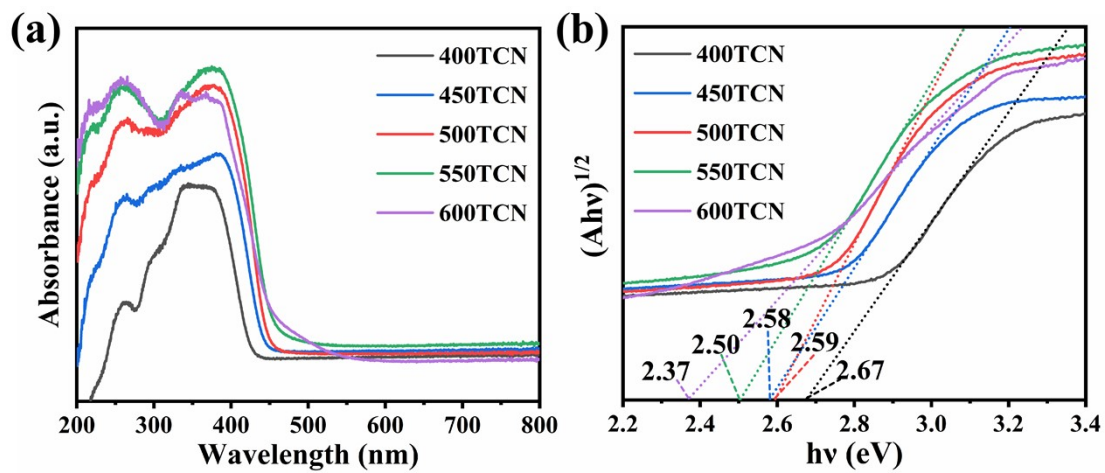

**Figure S7.** UV-vis DRS (a) and Tauc plot (b) for samples with different calcination temperatures.

**Table S1.** Nomenclature of carbon nitride samples

| Name    | Precursor     | Heating rate             | Calcination temperature | Holding time |
|---------|---------------|--------------------------|-------------------------|--------------|
| TCN-1   | Melamine      | 1 °C min <sup>-1</sup>   | 500 °C                  | 2 h          |
| TCN-2.5 | -             | 2.5 °C min <sup>-1</sup> | -                       | -            |
| TCN-5   | -             | 5 °C min <sup>-1</sup>   | -                       | -            |
| TCN-8   | -             | 8 °C min <sup>-1</sup>   | -                       | -            |
| TCN-10  | -             | 10 °C min <sup>-1</sup>  | -                       | -            |
| 400TCN  | Melamine      | 5 °C min <sup>-1</sup>   | 400 °C                  | 2 h          |
| 450TCN  | -             | -                        | 450 °C                  |              |
| 550TCN  | -             | -                        | 550 °C                  |              |
| 600TCN  | -             | -                        | 600 °C                  |              |
| UCN     | Urea          | 5 °C min <sup>-1</sup>   | 500 °C                  | 2 h          |
| SCN     | Thiourea      | -                        | -                       | -            |
| DCN     | Dicyandiamide | -                        | -                       | -            |

“-” indicates the same as in the previous line.

**Table S2.** Comparison of tubular carbon nitride

| Sample                     | Precursor                                                        | Method                                                                                  | Size                                   | Morphology                                                                            |
|----------------------------|------------------------------------------------------------------|-----------------------------------------------------------------------------------------|----------------------------------------|---------------------------------------------------------------------------------------|
| TCN-5 <sup>This work</sup> | melamine                                                         | Calcination (500 °C, 5 °C min <sup>-1</sup> , 4h)                                       | Conical<br>L: 5-10 μm<br>D: 0.2-0.5 μm | 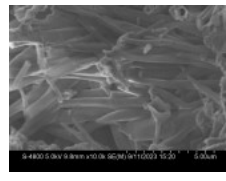   |
| TGCN-B2 <sup>2</sup>       | cyanuric acid + H <sub>3</sub> BO <sub>3</sub> (A), melamine (B) | 1. Solutions A and B, mixing, stirring (120 °C, 12h)<br>2. Calcination                  | D: 0.5-1 μm                            |    |
| GCNT <sup>3</sup>          | isonicotinic acid, melamine                                      | 1. Hydrothermal<br>2. Calcination                                                       | Hexagonal<br>D: ~1.5 μm                |    |
| HTCN <sup>4</sup>          | melamine                                                         | 1. Hydrothermal<br>2. Calcination on N <sub>2</sub><br>3. Calcination on H <sub>2</sub> | Irregular micron                       |   |
| CNA <sup>5</sup>           | 5-aminouracil, cyanuric acid, melamine                           | 1. Stirring (12h), drying<br>2. Calcination                                             | D: 0.2-0.4 μm                          |  |
| Py-CNT <sup>6</sup>        | L-cysteine, urea                                                 | 1. Grinding and mixing<br>2. Calcination                                                | D: ~0.13 μm                            |  |
| TCN-1.5 <sup>7</sup>       | urea, melamine                                                   | 1. Hydrothermal<br>2. Calcination                                                       | Irregular micron                       |  |
| SCN600 <sup>8</sup>        | trithiocyanuric acid, melamine                                   | 1. Ultrasonic, stirring (12h), drying<br>2. Calcination                                 | D: 0.2-0.5 μm                          |  |
| K-CN-2 <sup>9</sup>        | melamine                                                         | 1. Hydrothermal with KBr<br>2. Calcination                                              | L: 15-30 μm<br>D: 2-3 μm               |  |

|                                                         |          |                                                                                                                     |                                                     |                                                                                       |
|---------------------------------------------------------|----------|---------------------------------------------------------------------------------------------------------------------|-----------------------------------------------------|---------------------------------------------------------------------------------------|
| ND-TCN-10 <sup>10</sup>                                 | melamine | 1. Hydrothermal<br>2. Calcination with KOH                                                                          | L: 20-50 $\mu\text{m}$<br>D: 2-5 $\mu\text{m}$      | 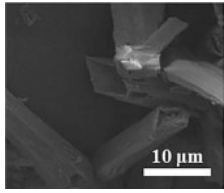   |
| PCN <sup>11</sup>                                       | melamine | 1. +SiO <sub>2</sub> , mixed, Calcination (600 °C, 4 °C min <sup>-1</sup> , 4h)<br>2. HF to remove SiO <sub>2</sub> | D: 0.2-0.4 $\mu\text{m}$                            |    |
| SCN <sup>12</sup>                                       | melamine | 1. Calcination → BCN<br>2. BCN + H <sub>2</sub> SO <sub>4</sub> , stirring, washing, drying<br>3. Recalcination     | L: 2-4 $\mu\text{m}$<br>D: 0.5-1 $\mu\text{m}$      |    |
| OCN-Tube <sup>13</sup>                                  | melamine | 1. Calcination<br>2. Take the sample from the end wall of the quartz tube                                           | Convoluteds<br>Nanosheets<br>D: ~0.02 $\mu\text{m}$ |    |
| tubular g-C <sub>3</sub> N <sub>4</sub> <sup>14</sup>   | melamine | 1. + ethylene glycol + HO <sub>3</sub> , stirring, washing, drying<br>2. Calcination                                | L: ~20 $\mu\text{m}$<br>D: ~0.8 $\mu\text{m}$       |   |
| tube-like g-C <sub>3</sub> N <sub>4</sub> <sup>15</sup> | melamine | 1. Shaking in the vibrator to reach a certain pile density<br>2. Calcination                                        | D: ~0.05 $\mu\text{m}$                              |  |

**Table S3.** Ratio of XPS fitted peak areas for different samples

|        |                  | N=C-N  | C-NH <sub>x</sub> | C-C    | NH <sub>x</sub> | N-(C) <sub>3</sub> | C=N-C  |
|--------|------------------|--------|-------------------|--------|-----------------|--------------------|--------|
| TCN-1  | peak position/eV | 288.23 | 286.15            | 284.80 | 401.21          | 399.84             | 398.62 |
|        | area ratio       | 80.0%  | 3.4%              | 16.6%  | 8.1%            | 20.4%              | 71.5%  |
| TCN-5  | peak position/eV | 288.32 | 286.29            | 284.80 | 401.42          | 400.32             | 398.72 |
|        | area ratio       | 80.5%  | 2.8%              | 16.7%  | 4.3%            | 21.3%              | 74.4%  |
| TCN-10 | peak position/eV | 288.29 | 286.29            | 284.80 | 401.46          | 400.53             | 398.68 |
|        | area ratio       | 82.8%  | 2.0%              | 15.2%  | 3.3%            | 12.8%              | 83.9%  |

**Table S4.** Comparison of photocatalytic reduction activity of Cr(VI) by different g-C<sub>3</sub>N<sub>4</sub>-based materials

| Sample                             | Catalyst amount | Cr(VI) solution amount           | Degradation rate  | Reaction rate constant $k$ /min <sup>-1</sup> |
|------------------------------------|-----------------|----------------------------------|-------------------|-----------------------------------------------|
| TCN-5 <sup>This work</sup>         | 20 mg           | 50 mL (100 mg L <sup>-1</sup> )  | 99.7% (80 min)    | 0.0369                                        |
| 11CN <sup>16</sup>                 | 50 mg           | 50 mL (10 mg L <sup>-1</sup> )   | 90% (40min)       | 0.0272                                        |
| CN-PG-S0.5wt.% <sup>17</sup>       | 50 mg           | 50 mL (10 mg L <sup>-1</sup> )   | 99.1% (75 min)    | 0.0329                                        |
| B-CN@BS-10 <sup>18</sup>           | 25mg            | 50 mL (20 mg L <sup>-1</sup> )   | 86.77 % (150 min) | -                                             |
| PHCN-1 <sup>19</sup>               | 10 mg           | 10 mL (30 mg L <sup>-1</sup> )   | -                 | 0.033                                         |
| CN-Br20 <sup>20</sup>              | 50 mg           | 50 mL (20 mg L <sup>-1</sup> )   | 61.6% (120 min)   | -                                             |
| OCNv-U <sub>40</sub> <sup>21</sup> | 60 mg           | 100 mL (50 mg L <sup>-1</sup> )  | 90.8% (120 min)   | -                                             |
| GCNX <sup>22</sup>                 | 20 mg           | 40 mL (0.8 mg mL <sup>-1</sup> ) | 68.4% (75 min)    | -                                             |

**Table S5.** The internal quantum efficiency (IQE) of the samples

| $\lambda/\text{nm}$ |                                   | 365      | 405      | 450      | 520      |
|---------------------|-----------------------------------|----------|----------|----------|----------|
|                     | P/W                               | 0.214    | 0.264    | 0.292    | 0.252    |
| TCN-1               | $j_{\text{ph}}/\text{mA cm}^{-2}$ | 7.50E-04 | 7.12E-04 | 7.93E-05 | 1.13E-05 |
|                     | A                                 | 0.96     | 0.81     | 0.18     | 0.16     |
|                     | IQE/%                             | 41.99    | 30.65    | 6.89     | 1.09     |
| TCN-2.5             | $j_{\text{ph}}/\text{mA cm}^{-2}$ | 7.16E-04 | 6.57E-04 | 9.00E-05 | 1.27E-05 |
|                     | A                                 | 0.98     | 0.87     | 0.20     | 0.15     |
|                     | IQE/%                             | 39.89    | 27.65    | 7.31     | 1.27     |
| TCN-5               | $j_{\text{ph}}/\text{mA cm}^{-2}$ | 9.76E-04 | 1.08E-03 | 1.42E-04 | 1.33E-05 |
|                     | A                                 | 1.01     | 0.88     | 0.20     | 0.15     |
|                     | IQE/%                             | 53.87    | 45.23    | 11.40    | 1.34     |
| TCN-8               | $j_{\text{ph}}/\text{mA cm}^{-2}$ | 9.13E-04 | 8.79E-04 | 1.18E-04 | 1.13E-05 |
|                     | A                                 | 1.02     | 0.89     | 0.22     | 0.16     |
|                     | IQE/%                             | 50.25    | 36.71    | 8.71     | 1.08     |
| TCN-10              | $j_{\text{ph}}/\text{mA cm}^{-2}$ | 7.70E-04 | 8.17E-04 | 1.23E-04 | 1.20E-05 |
|                     | A                                 | 1.01     | 0.89     | 0.20     | 0.14     |
|                     | IQE/%                             | 42.54    | 34.18    | 9.82     | 1.31     |



## References

1. J. Song and M. Z. Bazant, *Phys. Rev. Lett.*, 2018, **120**, 116001.
2. T. G. Nguyen, M. D. Nguyen, T. L. Do, V. T. Dang, T.-B. Nguyen and V. Hoang Huong, *Surfaces and Interfaces*, 2024, **54**, 105009.
3. X. Lin, Y. Ke, Y. Liu, X. Li, Z. Yu, D. Jiang and Y. Yuan, *International Journal of Hydrogen Energy*, 2024, **80**, 1234-1242.
4. B. Yang, J. Zhao, Y. Xiong, C. Li, M. Zhang, R. D. Rodriguez and X. Jia, *Chemical Engineering Journal*, 2024, **498**, 155117.
5. S. Li, Y. Yang, S. Wan, R. Wang, M. Yu, F. Song and Q. Zhong, *J. Colloid Interface Sci.*, 2023, **651**, 726-733.
6. Y. Ma, F. Liu, Y. Liu, X. Lan, Y. Zhu, J. Shi, W. Jiang, G. Wang and S. H. Park, *Chemical Engineering Journal*, 2021, **414**, 128802.
7. F. Guo, Z. Chen, Y. Shi, L. Cao, X. Cheng, W. Shi, L. Chen and X. Lin, *Renewable Energy*, 2022, **188**, 1-10.
8. X. Bai, M. Li, J. Li, X. Rao, S. Zheng and Y. Zhang, *ACS Applied Nano Materials*, 2022, **5**, 691-701.
9. T. Wu, Q. He, Z. Liu, B. Shao, Q. Liang, Y. Pan, J. Huang, Z. Peng, Y. Liu, C. Zhao, X. Yuan, L. Tang and S. Gong, *Journal of Hazardous Materials*, 2022, **424**, 127177.
10. H.-X. Fang, H. Guo, C.-G. Niu, C. Liang, D.-W. Huang, N. Tang, H.-Y. Liu, Y.-Y. Yang and L. Li, *Chemical Engineering Journal*, 2020, **402**, 126185.
11. R. Zhao, J. Gao, S. Mei, Y. Wu, X. Wang, X. Zhai, J. Yang, C. Hao and J. Yan, *Nanotechnology*, 2017, **28**.
12. R. C. Pawar, S. Kang, J. H. Park, J.-h. Kim, S. Ahn and C. S. Lee, *Scientific Reports*, 2016, **6**, 31147.
13. J. Fu, B. Zhu, C. Jiang, B. Cheng, W. You and J. Yu, *Small*, 2017, **13**, 1603938.
14. M. Tahir, C. Cao, F. K. Butt, F. Idrees, N. Mahmood, Z. Ali, I. Aslam, M. Tanveer, M. Rizwan and T. Mahmood, *Journal of Materials Chemistry A*, 2013, **1**, 13949-13955.
15. S. Wang, C. Li, T. Wang, P. Zhang, A. Li and J. Gong, *Journal of Materials Chemistry A*, 2014, **2**, 2885-2890.
16. Y. Gong, J. Chen, D. Ma and J. Zhong, *J. Colloid Interface Sci.*, 2025, **682**, 446-459.
17. Y. Ke, Q. You, J. Ai, X. Yang, Q. Shang, Y. Liu, D. Wang and G. Liao, *Journal of Materials Science & Technology*, 2023, **152**, 37-49.
18. S. M. Ghoreishian, K. S. Ranjith, M. Ghasemi, B. Park, S.-K. Hwang, N. Irannejad, M. Norouzi, S. Y. Park, R. Behjatmanesh-Ardakani, S. M. Pourmortazavi, S. Mirsadeghi, Y.-K. Han and Y. S. Huh, *Chem. Eng. J.*, 2023, **452**, 139435.
19. Y. Li, W. Wei, Z. Guo, L. Zou, M. Li, L. Ai and A. Wei, *Sep. Purif. Technol.*, 2022, **299**, 121730.

20. M. Wang, Y. Zeng, G. Dong and C. Wang, *Chin. J. Catal.*, 2020, **41**, 1498-1510.
21. V. Hasija, P. Singh, S. Thakur, K. Stando, V.-H. Nguyen, Q. V. Le, S. M. Alshehri, T. Ahamad, K. C. W. Wu and P. Raizada, *Appl. Mater. Today*, 2022, **29**, 101676.
22. D. Das, B. K. Das, R. Sarkar, S. Mukherjee and K. K. Chattopadhyay, *Environ. Res.*, 2023, **221**, 115263.
